# Supplementary material
Source: PubMed Central journal article supplement (PMC6430123)
Supplement: NIHMS1010544-supplement-sup.pdf [file NIHMS1010544-supplement-sup.pdf]

## Supplementary Materials

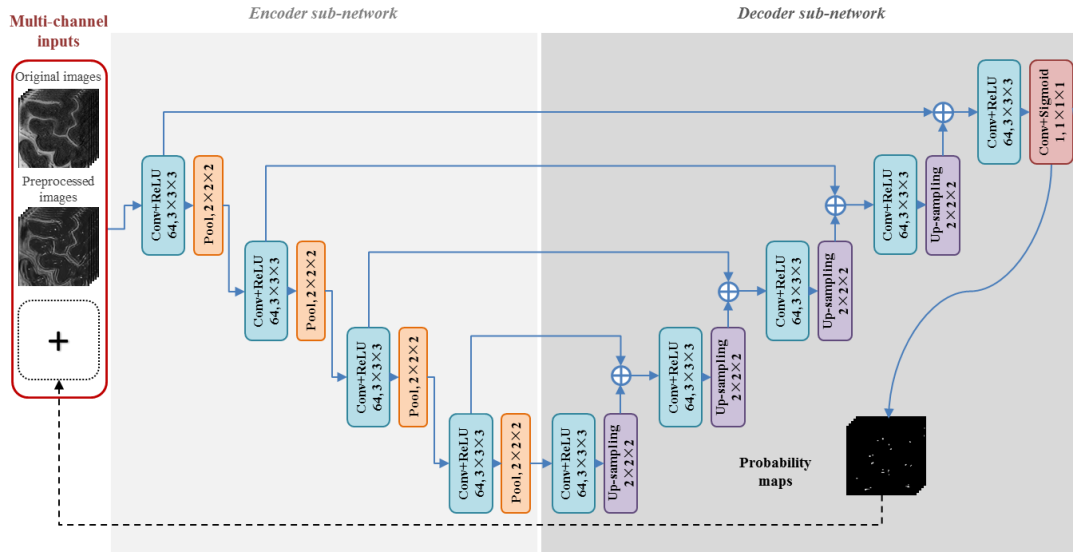

Figure S1: The network architecture of  $M^2EDN-S$ , i.e., a single-scale variant of the proposed  $M^2EDN$ . That is, no multi-scale feature learning is included in  $M^2EDN-S$ .
